# Supplementary material for: Stepwise vs. concerted pathways in scandium ion-coupled electron transfer from superoxide ion to p-benzoquinone derivatives
Source: Royal Society of Chemistry journal article supplement (doi:10.1039/c0cp00916d), 2011-01-01
Supplement: c0cp00916d.pdf [file c0cp00916d.pdf]

## Electronic Supplementary Information

### Stepwise vs. concerted pathways in scandium ion-coupled electron transfer from superoxide ion to *p*-benzoquinone derivatives

Tomonori Kawashima,<sup>a</sup> Kei Ohkubo<sup>a</sup> and Shunichi Fukuzumi<sup>\*a,b</sup>

<sup>a</sup> *Department of Material and Life Science, Graduate School of Engineering, Osaka University, SORST, Japan Science and Technology Agency (JST), Suita, Osaka 565-0871, Japan*

<sup>b</sup> *Department of Bioinspired Science, Ewha Womans University, Seoul 120-750, Korea*

\* To whom correspondence should be addressed.

E-mail: [fukuzumi@chem.eng.osaka-u.ac.jp](mailto:fukuzumi@chem.eng.osaka-u.ac.jp)

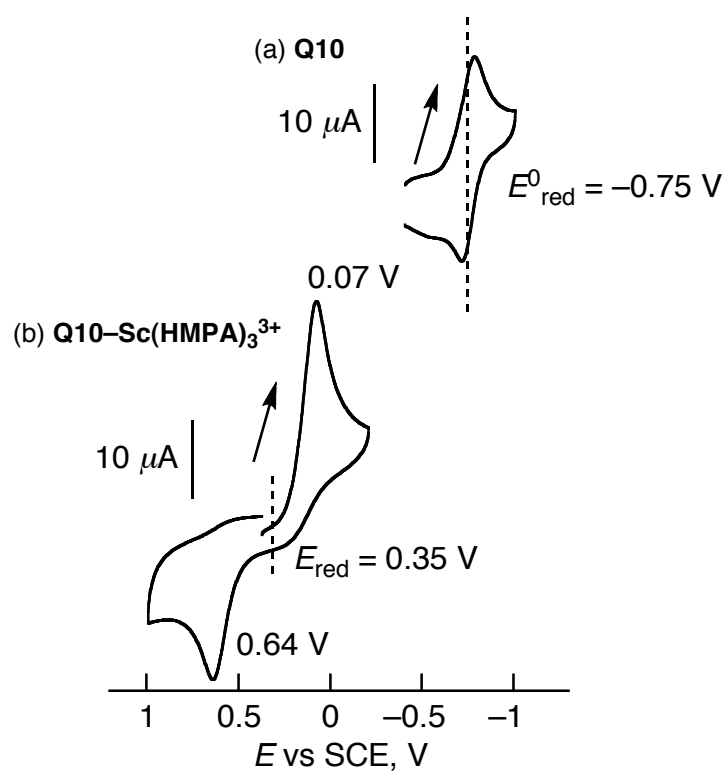

**Fig. S1** Cyclic voltammograms of coenzyme Q10 ( $1.0 \times 10^{-3} \text{ M}$ ) (a) in the absence and (b) in the presence of  $\text{Sc}(\text{HMPA})_3^{3+}$  ( $1.0 \times 10^{-2} \text{ M}$ ) in deaerated EtCN containing  $\text{TBAPF}_6$  ( $0.10 \text{ M}$ ) using glassy carbon working electrode at  $298 \text{ K}$  with a sweep rate of  $100 \text{ mV s}^{-1}$ .

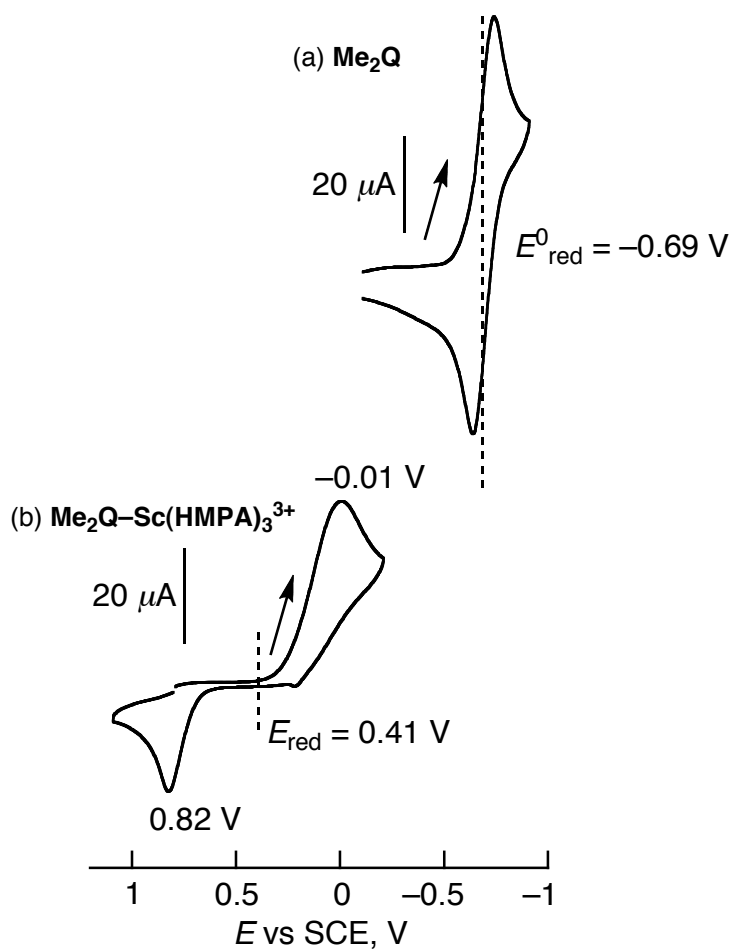

**Fig. S2** Cyclic voltammograms of 2,5-dimethyl-*p*-benzoquinone ( $\text{Me}_2\text{Q}$ :  $2.0 \times 10^{-3} \text{ M}$ ) a) in the absence and b) in the presence of  $\text{Sc}(\text{HMPA})_3^{3+}$  ( $1.0 \times 10^{-2} \text{ M}$ ) in deaerated EtCN containing TBAPF<sub>6</sub> (0.10 M) using glassy carbon working electrode at 298 K with a sweep rate of  $100 \text{ mV s}^{-1}$ .

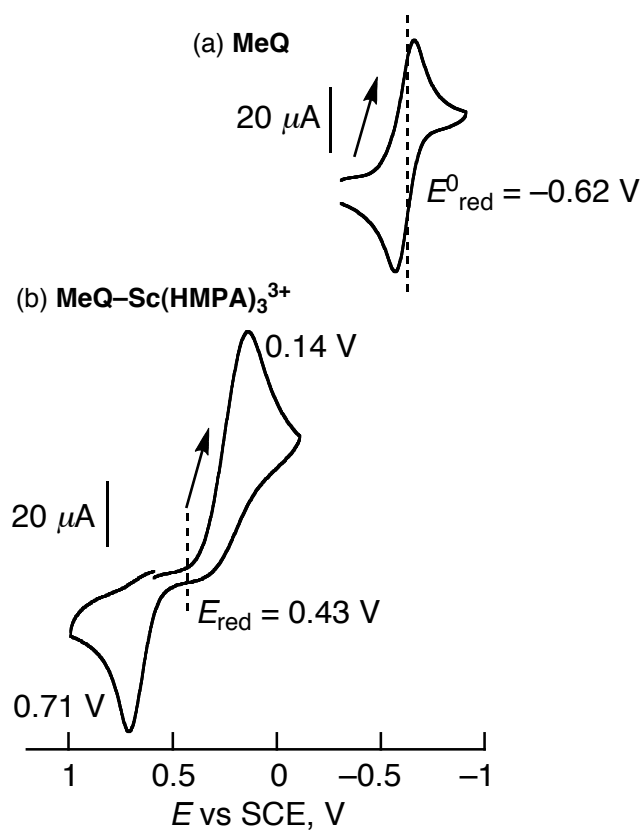

**Fig. S3** Cyclic voltammograms of *p*-toluquinone (MeQ:  $2.0 \times 10^{-3} \text{ M}$ ) (a) in the absence and (b) in the presence of Sc(HMPA) $_3^{3+}$  ( $1.0 \times 10^{-2} \text{ M}$ ) in deaerated EtCN containing TBAPF $_6$  (0.10 M) using glassy carbon working electrode at 298 K with a sweep rate of  $100 \text{ mV s}^{-1}$ .

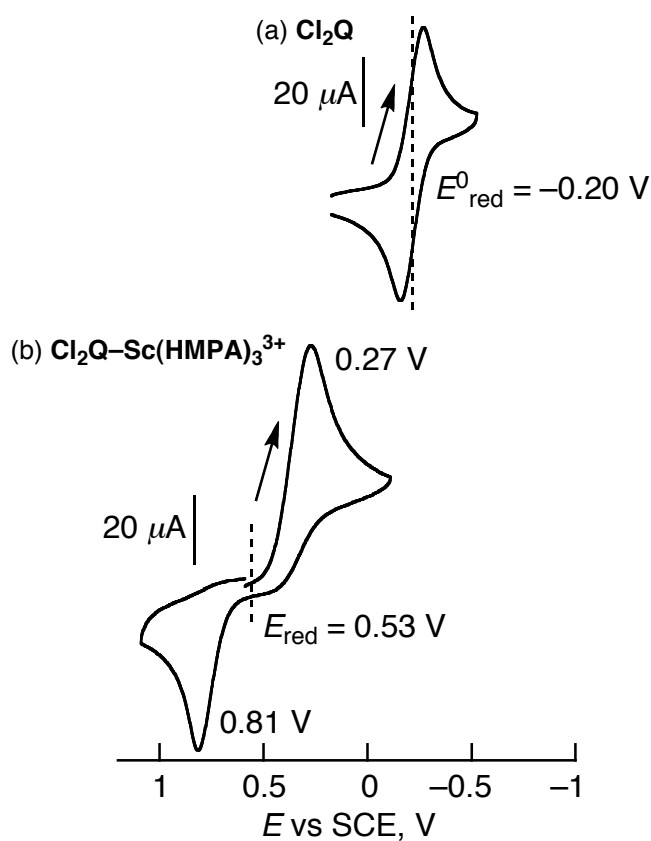

**Fig. S4** Cyclic voltammograms of 2,5-dichloro-*p*-benzoquinone ( $\text{Cl}_2\text{Q}$ :  $2.0 \times 10^{-3} \text{ M}$ ) (a) in the absence and (b) in the presence of  $\text{Sc}(\text{HMPA})_3^{3+}$  ( $1.0 \times 10^{-2} \text{ M}$ ) in deaerated EtCN containing TBAPF<sub>6</sub> (0.10 M) using glassy carbon working electrode at 298 K with a sweep rate of  $100 \text{ mV s}^{-1}$ .

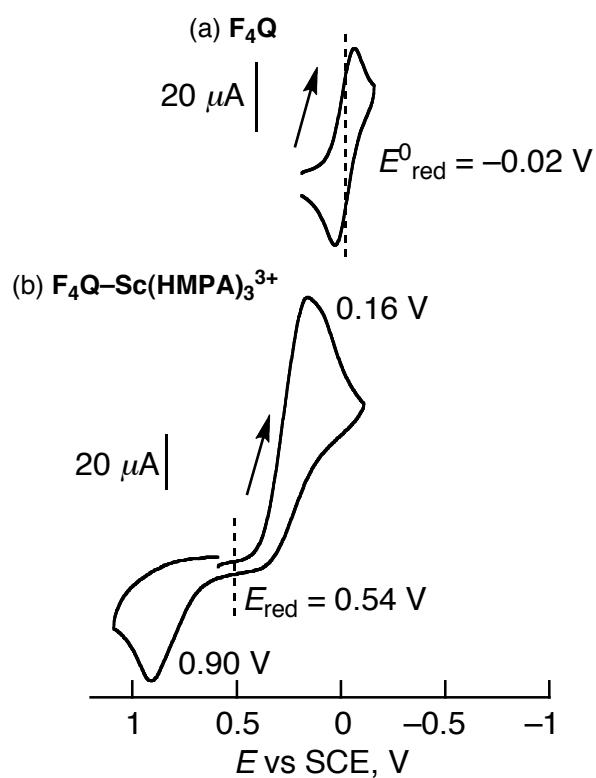

**Fig. S5** Cyclic voltammograms of *p*-fluoranil ( $\text{F}_4\text{Q}$ :  $2.0 \times 10^{-3} \text{ M}$ ) (a) in the absence and (b) in the presence of  $\text{Sc}(\text{HMPA})_3^{3+}$  ( $1.0 \times 10^{-2} \text{ M}$ ) in deaerated EtCN containing  $\text{TBAPF}_6$  ( $0.10 \text{ M}$ ) using glassy carbon working electrode at  $298 \text{ K}$  with a sweep rate of  $100 \text{ mV s}^{-1}$ .

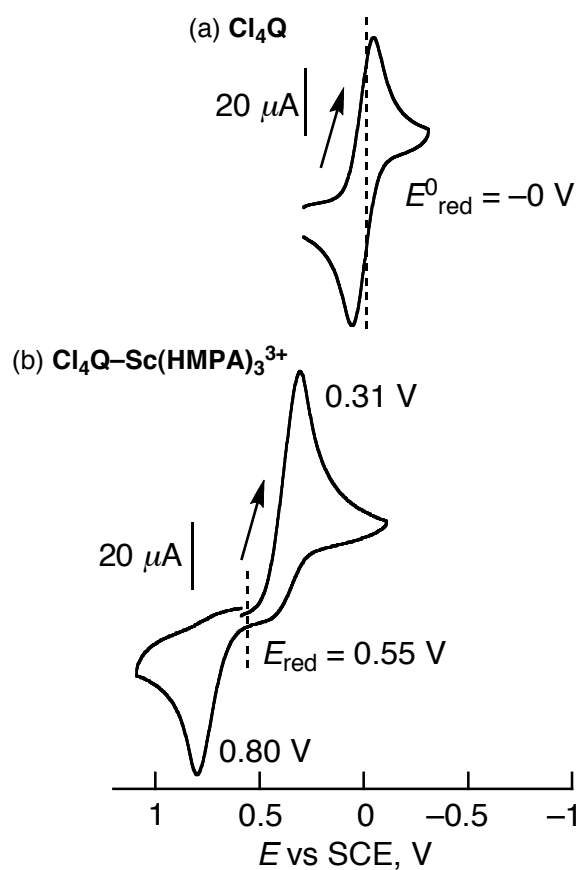

**Fig. S6** Cyclic voltammograms of *p*-chloranil ( $\text{Cl}_4\text{Q}$ :  $2.0 \times 10^{-3} \text{ M}$ ) (a) in the absence and (b) in the presence of  $\text{Sc}(\text{HMPA})_3^{3+}$  ( $1.0 \times 10^{-2} \text{ M}$ ) in deaerated EtCN containing  $\text{TBAPF}_6$  ( $0.10 \text{ M}$ ) using glassy carbon working electrode at  $298 \text{ K}$  with a sweep rate of  $100 \text{ mV s}^{-1}$ .
